# Supplementary material for: Effects of Melatonin Treatment of Postharvest Pear Fruit on Aromatic Volatile Biosynthesis
Source: PubMed Central journal article supplement (PMC6930639; doi:10.3390/molecules24234233), 2019-11-21
Supplement: molecules-24-04233-s001.pdf [file molecules-24-04233-s001.pdf]

**Table S1.** Authentic standard compounds used in the GC-MS analysis and standard curve equations.

| Chemical              | Source <sup>a</sup> | Range<br>( $\mu\text{g/mL}$ ) | Curves <sup>b</sup>                        | CF <sup>c</sup> | R <sup>2</sup> |
|-----------------------|---------------------|-------------------------------|--------------------------------------------|-----------------|----------------|
| Ethyl Acetate         | Sigma               | 0.009-0.036                   | $y = 6,074,673,634.05 x + 64,447,384.87$   | 2.29            | 0.974          |
| Propyl acetate        | Sigma               | 0.00875-0.035                 | $y = 9,083,131,385.96 x + 217,940,374.05$  | 2.15            | 0.989          |
| Ethyl butyrate        | Sigma               | 0.00875-0.035                 | $y = 22,875,292,640.97 x + 57,135,891.73$  | 3.43            | 0.99           |
| Butyl acetate         | Sigma               | 0.00875-0.035                 | $y = 7,382,735,532.07 x + 130,891,812.94$  | 0.76            | 0.991          |
| Hexanal <sup>a</sup>  | Sigma               | 0.00825-0.035                 | $y = 8,450,347,240.69 x + 114,964,167.33$  | 5.2             | 0.991          |
| 2-Methylbutyl acetate | Sigma               | 0.0035-0.00875                | $y = 17,096,133,241.01 x + 59,925,828.39$  | 2.34            | 0.996          |
| Amyl acetate          | Sigma               | 0.00875-0.035                 | $y = 23,152,246,097.23 x - 39,201,024.73$  | 2.66            | 0.996          |
| Hex-2-Enal            | Sigma               | 0.00825-0.035                 | $y = 16,276,075,224.10 x - 132,779,325.15$ | 1               | 0.990          |
| 2-Methyl-1-butanol    | Sigma               | 0.016-0.048                   | $y = 3,905,760,970.87 x - 27,960,897.71$   | 0.176           | 0.986          |
| Hexyl acetate         | Sigma               | 0.0085-0.034                  | $y = 23,468,843,104.46 x + 114,015,306.80$ | 3               | 0.995          |
| Hexyl alcohol         | Sigma               | 0.016-0.048                   | $y = 2,657,296,400.25 x - 4,202,342.98$    | 0.11            | 0.997          |

<sup>a</sup>Sigma, Sigma-Aldrich Co. Ltd. (St. Louis, MO, USA);

<sup>b</sup>y is the ratio of the area of the peak of an authentic standard; x is the weight of an authentic standard in  $\mu\text{g}$ .

<sup>c</sup>CF: correction factor. CF was calculated as a mean using  $[(C1/A1)/(C2/A2)]$ , where C1 is the concentration of the authentic standard, A1 is the peak area of the authentic standard (TIC) or the peak area of the corresponding quantifying ion (SIM mode), C2 is the concentration of the internal standard, and A2 is the peak area of the quantifying ion of the internal standard.

**Table S2. List of qRT-PCR primers**

| Primers       | Forward/Reverse | Sequences(5'-3')        |
|---------------|-----------------|-------------------------|
| <i>PbLOX1</i> | F               | CCTCCCTGATCAGCATCGTT    |
|               | R               | TTTGAGCTCACCAGAAGCGG    |
| <i>PbLOX2</i> | F               | GGTGATCCGTGCCACTTCTA    |
|               | R               | AACCCTCCTGTTACTGTCACC   |
| <i>PbHPL</i>  | F               | CCGGACACCTTTAAACCGGA    |
|               | R               | TGGACTCACTTGGTGAACCG    |
| <i>PbADH1</i> | F               | GCATTGAATGTACAGGAAGCGTT |
|               | R               | GAAGACGGCTTCTTTGTGTGG   |
| <i>PbADH2</i> | F               | CGACTGCAACAAGCGTTCAA    |
|               | R               | GGAAGGTCGGTCTTCGGTTT    |
| <i>PbADH3</i> | F               | CACCTCAGGCCATGGAAGTT    |
|               | R               | TGGCCGAAAATTCGAGGGAA    |
| <i>PbAAT</i>  | F               | TCCACCCACCTAATTTCCAC    |
|               | R               | TGAATGAAATGCGGACATCCTG  |

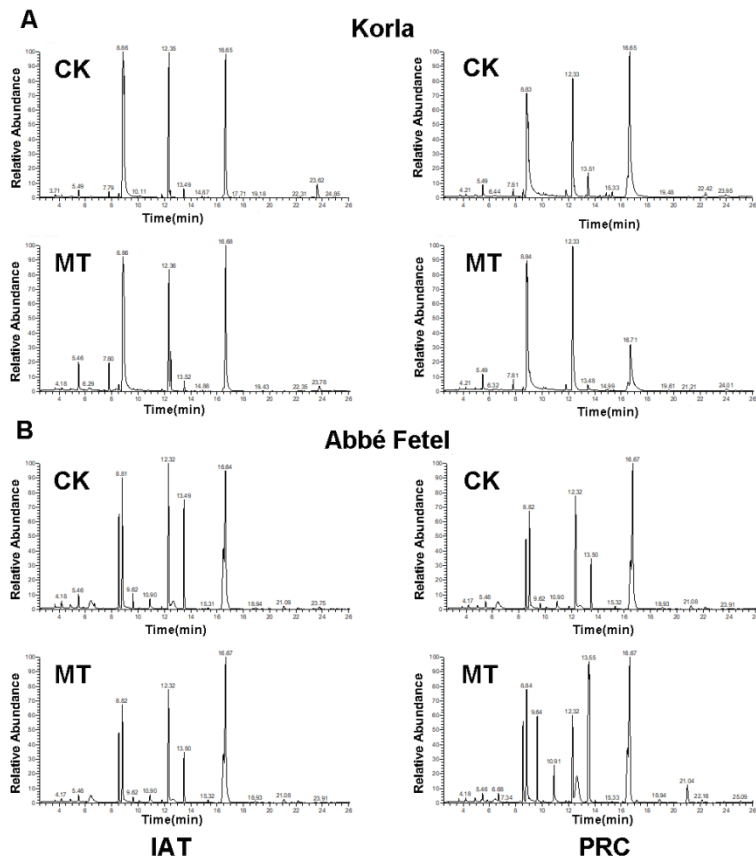

**Figure S1.** GC-MS chromatograms of volatile production determinations. (a) effect of melatonin on volatile production in 'Korla' pear; (b) effect of melatonin on volatile production in 'Abbé Fétel' pear.
